# Supplementary material
Source: bioRxiv or medRxiv preprint supplement (https://www.biorxiv.org/highwire/filestream/67774/field_highwire_adjunct_files/12/157404-6.pdf)
Supplement: Supplementary file [file 157404-6.pdf]

**Table 1****Estimated catastrophe frequencies of the microtubules at the cortex**

|                     | anterior cortex | posterior cortex |
|---------------------|-----------------|------------------|
| control (N2)        | 0.31 (/s)       | 0.72 (/s)        |
| <i>apr-1</i>        | 0.53 (/s)       | 0.59 (/s)        |
| <i>mom-5</i>        | 0.20 (/s)       | 0.44 (/s)        |
| <i>apr-1; mom-5</i> | 0.58 (/s)       | 0.51 (/s)        |

When catastrophe occurs stochastically with the frequency of  $\lambda$ , the probability distribution of the cortical residency time will be  $P(t) = \lambda \exp(-\lambda t)$ . Therefore, the probability of observing cortical residency time between  $t_1$  and  $t_2$  will be  $P(t_1 \sim t_2) = \exp(-\lambda t_1) - \exp(-\lambda t_2)$ . We fitted the experimentally obtained probability distribution of the cortical MT residency time to this equation to estimate the catastrophe frequencies of the MTs at the cortex
